# Supplementary material for: Quantifying within-host diversity of H5N1 influenza viruses in humans and poultry in Cambodia
Source: PubMed Central journal article supplement (PMC6992230; doi:10.1371/journal.ppat.1008191), 2020-01-17
Supplement: ppat.1008191.s001.pdf [file ppat.1008191.s001.pdf]

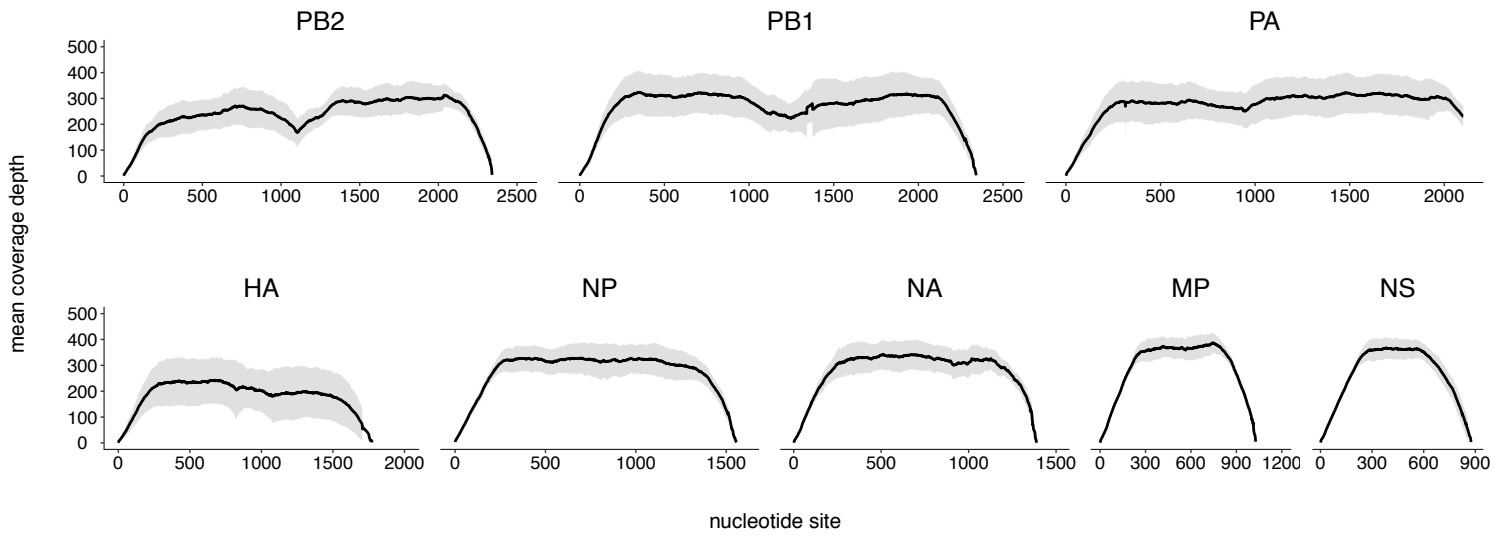

**Figure S1: Genome coverage**

The mean coverage depth at each nucleotide site (x-axis) for each gene across our 8 human and 5 duck samples is shown. Solid black lines represent the mean coverage across samples, and the grey shaded area represents the standard deviation of coverage depth across samples.
