# Supplementary material for: Quantifying within-host diversity of H5N1 influenza viruses in humans and poultry in Cambodia
Source: PubMed Central journal article supplement (PMC6992230; doi:10.1371/journal.ppat.1008191), 2020-01-17
Supplement: ppat.1008191.s004.pdf [file ppat.1008191.s004.pdf]

**a**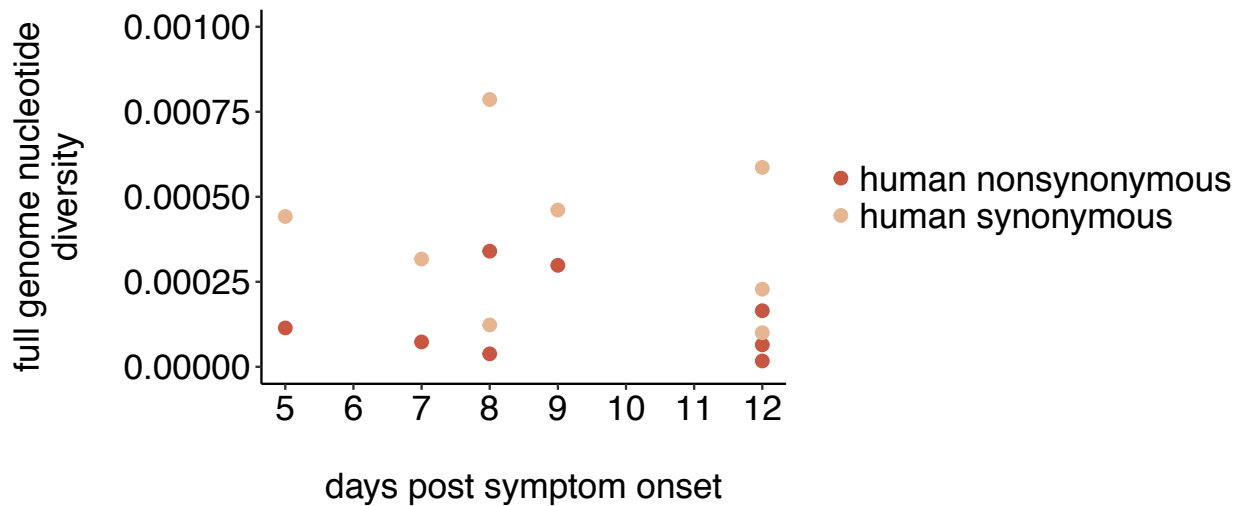**b**

|                             | “early infection” (5-8 days) | “late infection” (9-12 days) |
|-----------------------------|------------------------------|------------------------------|
| host-specific mutations     | 18                           | 22                           |
| non-host specific mutations | 82                           | 84                           |

### Figure S4: Neither diversity nor host-specific mutations increase over time

**(a)** For each human sample, the full genome nucleotide diversity ( $\pi_N$  or  $\pi_S$ ) is plotted vs. the days post-symptom onset. Dark red dots represent the mean, full-genome nonsynonymous diversity for a given sample ( $\pi_N$ ), and light red dots represent the mean, full-genome synonymous diversity for that same sample ( $\pi_S$ ). Neither nonsynonymous nor synonymous diversity are correlated with days post symptom onset (nonsynonymous:  $r^2 = -0.17$ ,  $p = 0.69$ ; synonymous:  $r^2 = -0.22$ ,  $p = -0.61$ ). **(b)** To compare whether the number of putative host-adapting mutations increased over time in humans, we compared the number of host-specific and non-host specific mutations in humans sampled either in “early infection” (5-8 days post symptom onset), or in “late infection” (9-12 days post symptom onset). We divided the data into these categories by splitting on the mean days post symptom onset for human samples, which was 8 days. We then compared the proportion of host-specific variants during early and late infections with a Fisher’s exact test. The proportion of variants that are host-specific is not different in early vs. late infections ( $p = 0.72$ ).
